# Extensive Fluid Extravasation after Arthroscopic Shoulder Surgery

Valentina G. Nicola, M.D., Ki Jinn Chin, M.B.B.S., F.R.C.P.C., Paul G. McHardy, M.D., F.R.C.P.C.

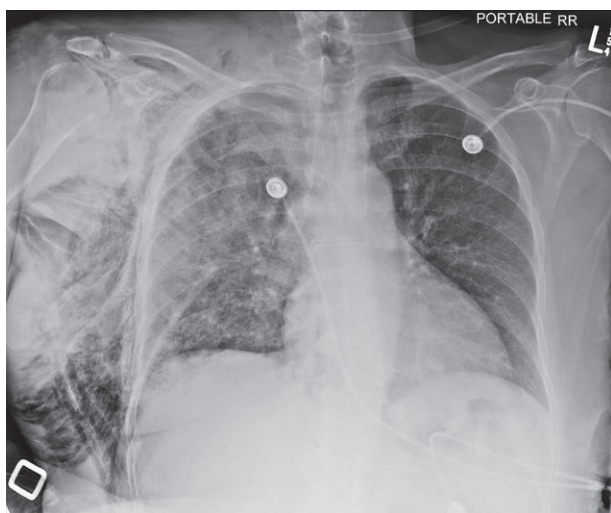

A 64-yr-old woman underwent an arthroscopic rotator cuff repair under general anesthesia plus brachial plexus block. On emergence, she complained of right-sided chest pain and dyspnea, with mild hypoxemia requiring supplemental oxygen. Chest x-ray film (fig.) ruled out pneumothorax and confirmed the presence of extensive air and fluid in the soft tissues of the right shoulder, chest, and lower neck. The image showed no hemidiaphragmatic elevation, pulmonary edema, pleural effusion, or atelectasis. A thoracic erector spinae block was performed, which relieved the patient's chest pain and dyspnea.

The differential diagnosis of dyspnea after arthroscopic shoulder surgery and interscalene brachial plexus block includes hemidiaphragmatic paresis and pneumothorax, and other etiologies associated with general anesthesia if they apply. Fluid extravasation into the shoulder and chest is common and can cause chest pain and tightness with subjective respiratory distress.<sup>1</sup> Actual airway compromise may result if this extends into the neck. Subcutaneous

emphysema is a rare complication attributed to air entrainment during surgical irrigation and can cause pneumothorax. While a chest x-ray film is essential to guide diagnosis and management, ultrasound can also be used to identify intramuscular fluid, hemidiaphragmatic paresis, and pneumothorax,<sup>2</sup> as long as subcutaneous air does not obstruct visualization. In the accompanying video (Supplemental Digital Content 1, <http://links.lww.com/ALN/C671>), an ultrasound was used to diagnose fluid collections in the chest wall after shoulder arthroscopy, which appear as black hypoechoic bands within the pectoralis muscles of the chest wall. The video also demonstrates an approach to a thoracic erector spinae block that may alleviate pain and chest tightness by blocking the intercostal nerves and possibly the sympathetic chain.<sup>3</sup>

## Competing Interests

The authors declare no competing interests.

## Correspondence

Address correspondence to Dr. McHardy: [paul.mchardy@sunnybrook.ca](mailto:paul.mchardy@sunnybrook.ca)

## References

1. Memon M, Kay J, Gholami A, Simunovic N, Ayeni OR: Fluid extravasation in shoulder arthroscopic surgery: A systematic review. *Orthop J Sports Med* 2018; 6:2325967118771616
2. Haskins SC, Tsui BC, Nejim JA, Wu CL, Boublik J: Lung ultrasound for the regional anesthesiologist and acute pain specialist. *Reg Anesth Pain Med* 2017; 42:289–98
3. Chin KJ, El-Boghdady K: Mechanisms of action of the erector spinae plane (ESP) block: A narrative review. *Can J Anaesth* 2021; 68:387–408

Supplemental Digital Content is available for this article. Direct URL citations appear in the printed text and are available in both the HTML and PDF versions of this article. Links to the digital files are provided in the HTML text of this article on the Journal's Web site ([www.anesthesiology.org](http://www.anesthesiology.org)).

From the Departments of Anesthesia at Sunnybrook Health Sciences Center (V.G.N., P.G.M.) and Toronto Western Hospital (K.J.C.), University of Toronto, Toronto, Ontario, Canada.

Copyright © 2021, the American Society of Anesthesiologists. All Rights Reserved. *Anesthesiology* 2021; 135:728. DOI: 10.1097/ALN.0000000000003926
